# Supplementary material for: Genome wide survey of G protein-coupled receptors in Tetraodon nigroviridis
Source: PubMed Central journal article supplement (PMC1187884; doi:10.1186/1471-2148-5-41), 2005-07-15
Supplement: 1471-2148-5-41-S3.pdf [file 1471-2148-5-41-S3.pdf]

ht1R1 -----MLLCTARLVGLQLLISCCWAFACHSTESS---PDFTLPGDYLLAGLFPPLHSGCLQVRHR----  
rT1R1 -----MLFWAAHLL-LSLQLVYCWAFSCQRTSS---PGFSLPGDFLLAGLFSLHGDCLOVRHR----  
CAG03219.1 -----MHLQTGTFAILLSTTNLVLQLVRGELDRSSHGQGMQLHGNFSIAGFFPLHYGYEPDGRLP----  
rT1R2 -----MGPOARTLCLLSLLHLVLPKPKLVENSND---FHLAGDYLLGGLFTLHANVKSISHLSS---  
ht1R2 -----MGPRAKTIICSLFFLLWVLAEP---AENSD---FYLPGDYLLGGLFSLHANMKGIVHLN---  
rT1R3 -----MPGLAILGLSLAAFLLELGMGSSSLCLSQQ---FKAQGDYILGGLFPLGTTEEATLNQR---  
ht1R3 -----MLGPAVLGLSLWALLHPGTGAPLCLSQQ---LRMKGDYVLGGLFPLGEAEAEAGLRSR---  
CAG07037.1 -----MAVPPTLLVFLLVCKLTCSTPAWFQNIISTN--LFNLPGDIMLGGFLFPINQLTSNLSQRT---  
CAG03196.1 MSEGDSVGESIHGKPSVVSFAFFTRIGQIYQSWLDKSTPFYAVRWAATLLLTAVYMRVYLLQGWYIVTYA  
CAG03199.1 -----MGRSLACLCLLGLVLYPLARGTVPASE---FRLEGDYLLGGLFEIHYDTFPTPHDR---  
mGluR1 ---MVRLLLIFFPMIFLEMSILPRMPDRKVLLAGASSQRSVARMGDVVIIGALFSVHHQPPAEKVPE---

ht1R1 -----PEVTLCDRSCSFNEHGYHLFQAMRLGVVEINNST---ALLPNITLG--YQLYDVC  
rT1R1 -----PLVTSICDRPDSFNHGYHLFQAMRFTVEEINNSS---ALLPNITLG--YELYDVC  
CAG03219.1 -----ALALCKDGD-LNKHGFHLLHAMKLAVEEINSNTGAQSLLPGVMLG--YQMYDTC  
rT1R2 -----YLQVPKCN-EFTMKVLGYNLMQAMRFAVEEINNCS---SLLPGVLLG--YEMVDVC  
ht1R2 -----FLQVPMCK-EYEVKVIQYNLMQAMRFAVEEINNDS---SLLPGVLLG--YEIVDVC  
rT1R3 -----TQPNGILCTRFSPLGLFLAMAMKMAVEEINNGS---ALLPGLRLG--YDLFDTC  
ht1R3 -----TRPSSPVCTRFSSNGLLWALAMKMAVEEINNKSS---DLLPGLRLG--YDLFDTC  
CAG07037.1 -----EPDQITCDRIDSGLGMAIVMKYAVDEINANQ---FLLPGIRLG--YEIHDTG  
CAG03196.1 LGIYHLNLFIAFLSPKVDPSLLDEDEGPAIPKQNEEFRRPFIIRLPEFKFVHSATKGIVIAMVCTFFFEVF  
CAG03199.1 -----PESLDCSSKTLFPLSNYRRFQLMRFAVAEINNST---DLLPNVTLG--YEVFDHC  
mGluR1 -----RKCGEIREQVGIQRVEAMFHTLDKINADP---VLLPNITLG--SEIRDSC

ht1R1 SDSAN-VYATLRVLSLPGQHHELOGLLHYSPE-----TVLAVI  
rT1R1 SESAN-VYATLRVLALQGRHIEIQKDLRNHSS-----KVVAFI  
CAG03219.1 SESAS-ILASLDVLDYWSSSASGTEPDEFSTSQ-----PLAVI  
rT1R2 YLSNN-IHPGLYFLAQD-DDLLPILKDYSSQYMP-----HVVAVI  
ht1R2 YISNN-VQPVLYFLAHE-DNLLPIQEDYSNYIS-----RVVAVI  
rT1R3 SEPVVTKPMSLMFMKAVGSSQIAAYCNYTQYQP-----RVLAVI  
ht1R3 SEPVVAMKPSLMFLAKAGSRDIAAYCNYTQYQP-----RVLAVI  
CAG07037.1 RQSAVIIIRPTIYYLRAKHNDNLIAQCNYTNYET-----RISAVI  
CAG03196.1 NVPVFWPILVMYFIMLFCLTMKRQIKHMLKYRYLPFTHGKRTYKGDDETKGPLHLNEFFIRMLKSKLSTL  
CAG03199.1 SDTRCFAGIFKLLSVDNVVQPNVPGKVS-----KVVAVV  
mGluR1 WHSSVALEQSIFFIRDSLISIRDEKDGLENRCLPDGQTL-----PPGRTKKPIAGVI

ht1R1 GPDS-----INRAATTAALLSPFLVPMISYAAAS  
rT1R1 GPDN-----TDHAVTTAALLGPFLMPLVSYEAS  
CAG03219.1 GPDS-----SSKSFTPATLLGAYLVPQVSYEAN  
rT1R2 GPDN-----SESAITVSNILSHFLIPQITYSAS  
ht1R2 GPDN-----SESVMTVANFLSLFLLPQITYSAS  
rT1R3 GPHS-----SELALITGKFFSFFLMPQVSYSAM  
ht1R3 GPHS-----SELAMVTGKFFSFFLMPQVSYSAM  
CAG07037.1 GPNN-----SELVSVIGKLLGFFLMPQISYGAS  
CAG03196.1 NPSSQSFLLPNYRRFQLMRFSMEEINNSSDLLPGVSLGYEIFDICSDDLQSFPGVLKQISVNGSVSYGAS  
CAG03199.1 GLFT-----STFTLTVPAPLFMMDFIPMISYGSAS  
mGluR1 GPGS-----SSVAIQVQNLQLFDIPQIAYSAS

ht1R1 ETLVSKRQYPSFLRTPNPKYQVETMVLQKFGWTWISLVGSSDDYGGQLGVQALENQATGQ-GICIAFK  
rT1R1 VVLSAKRKFPFSLRTPVPSRHQVEVMVQLLQSFQWVWISLIGSYGDYGGQLGVQALEELAVPR-GICVAFK  
CAG03219.1 EMLSNKIFYPAFFRTIPSKNQVAAMIQLLVRFNWTWVALLGSDNSYGLEGMRSLSQQAAPH-HICIAFQ  
rT1R2 DKLRDKRHFPFSLRTPVPSHHEIAMVQMLVHFQWNWIVLVSDDDYGRNSHLLSQRLLTKTSDICIAFQ  
ht1R2 DELRDKVRFPFALLRTPVPSDHHVEAMVQMLHFRWNWIVLVSSDTPYGRDNGQLLGERVARR-DICIAFQ  
rT1R3 DRLSDRETFPSFFRTVPSRVQLQAVVTLQNFNSWNVVAALGSDDDYGREGLSIFSGLANSR-GICIAHE  
ht1R3 ELLSARETFPSFFRTVPSRVQLTAAEELLQEFQGNWVAALGSDDEYGRQGLSIFSAALAAAR-GICIAHE  
CAG07037.1 DKFSDNLLYPSFFRTVPSKQVQVEAMVLLLEFNWNVVAVVGSDEEYQGRGVQDFSKVAANR-SICVAYQ  
CAG03196.1 SVFSSNENFPFSLRTPVPSKEVINVIIRILQHFNRWAAFLNSDNDYFGIDGRNLFIQGKIDT-DICLAYT  
CAG03199.1 SILSEKVKFPFSLRTPVPSQEVIVQVIVKLLQYFKWHWVAFVLYSNDDYGANAKLFIKIKNT-DICLAYT  
mGluR1 IDLSDKTLYKYFLRVVPSHTLQARAMLDIVKRYNWTYVSAVHTEGNYGESGMDAFKELAAQE-GLCIAHS

hT1R1 DIMPFSQVVG-----DERMQLMRHLAQ--AGATVVVVVSSRQLARVFFESVVLNLT-GKVWVASZAW  
rT1R1 DIVPFSARVG-----DPRMQSMMQHLAQ--ARTTVVVVFSNRHLARVFFRSVVLNLT-GKVWVASEDW  
CAG03219.1 GVIPEYTRDT-----VALMRNIVDGILM--TKVTTIVVFSKSKLKFMPFVIERNVT-EKVWIGTEDW  
rT1R2 EVLPIPESSQVMRSEEQRQLDNILDKLRR--TSARVVVVSPELSLYSFFHEVLRWNFT-GFVWIASZSW  
hT1R2 ETLPTLQPNQNTSEERQRLVTIVDKLQQ--STARVVVVSFDPDLTLYHFFNEVLRQNFT-GAVWIASZSW  
rT1R3 GLVPQHDTSG---QQLGKVVVDVLRQVNO--SKVQVVVLFASARAVYSLFSYSILHDLS-PKVWVASESW  
hT1R3 GLVPLPRADD----SRLGKVDVLRQVNO--SSVQVVVLFASVHAHAHLFNYSISSRLS-PKVWVASZAW  
CAG07037.1 GLIPVYTDPE-----PVVKTIISNINS--TKANVVIVFSLPNQAEIFFQEVIRTELK--GVWIGSTAW  
CAG03196.1 ENLNMLTDFT-----QTFQQINL--QKINVIIVFAPKMFVEALINSAIKLNIS-DKVWIADZGW  
CAG03199.1 HDLVSSDFLS-----IFQWIKS--QKIVVIVVMAPEWSAKPLVKSALQHNVT-DKVWIAGEAW  
mGluR1 DKIIYSNAGEK-----SFDRLRLKRLRELPKARVVVCFCEGMTVRGLLSAMRRLGVVGEFSLIGSDGW

hT1R1 ALRHHITGVPGIQRIGMVLGVAIQKRAVPG-LKAFEEAYARADKKA----PRPCHK-----GSWCSS  
rT1R1 AISTYITSVTGIQIGITVLGVAVQQRQVPG-LKEFEESYVRAVTA--PSACPE-----GSWCST  
CAG03219.1 SQSLSIAGIPGIHTIGTIVGVAIKYTVIPGFVERLAEASLQRSNEE----NASTV-----TVNP  
rT1R2 AIDPVLHNLTELRLHTGTFLGVTIQVSIIPG-FSQFRVRDKPGYPV---PNTTNL-----RTTCN-  
hT1R2 AIDPVLHNLTELGHGTFGLGITIQSVPIPG-FSEFREWGPQAGPPP---LSRTSQ-----SYTCN-  
rT1R3 LTRDLVMTLPNIARVGTVLGFLQRGALLPEFSHYVETRLALAADP----TFCASL---KAELDLEERVM  
hT1R3 LTRDLVMTLPGMAQMGTVLGFQGAQLHEFPQYVKTHLALATDP----AFCSALG--EREQGLEEDVV  
CAG07037.1 TIERVELLPNLHTVGTILGFAFTTQSLDLLRAYTHELTKVSEEH-AHTPPPVEN-----LNDY  
CAG03196.1 SLKKNLPKKEGIRRTIGVIGVSPVVTIPAFDDFIFSSKSKQKQCE-----EREE  
CAG03199.1 SLKRELPKKEGIRRTIGVIGVQLYLNLPRFQDFIYSVKKQNECES-----AE  
mGluR1 ADRDEVIEGYEVEANGGIT-IKLQSPVEVSEFDDYFLKLRDLDTNTRNP-WFPEFWQHRFQCRLPGLLENP

hT1R1 NQLCRECQAFMAHTMPKLFKAFS-----MSSAYNAYRAVYAVAHGLHQLLG--CASGA--CS---RGRVY  
rT1R1 NQLCRECHTFTRNMPGLGAFS-----MSAAYRVYEAAYAVAHGLHQLLG--CTSEI--CS---RGPVY  
CAG03219.1 NNTCLQSRRELYSLAEMNPLPLDN---YDIASAVNVYKAVYAVAHALHQLLR--CGSVE--CQ---RKRKY  
rT1R2 -QDCDACLNNTKSFNNILLSG-----ERVVYSVYSAVYAVAHALHRLLG--CNRGR--CT---KQKVY  
hT1R2 -QECDNCLNATLSFNLTILRLSG-----ERVVYSVYSAVYAVAHALHSLLG--CDKST--CT---KRVVY  
rT1R3 GPRCSQCDYIMLQNLSSGLMQLNSAGQLHHCIFATYAAVYSAVYAVAHALHNTLQ--CNVSH--CH--TSEPVO  
hT1R3 GQRCPQCDCITLQNVSAGLN-----HHQTFSVYAAVYSAVYAVAHALHNTLQ--CNASG--CP--AQDPVK  
CAG07037.1 SNSCPHCWNLSPANISLDAEVA-----IQRSARVYAAVYSAVYAVAHALHNTLQ--CNSTA--CMKTSVQIY  
CAG03196.1 QPFCNQACKCGYLSAEEITSAD-----PTSFSPVYSAVYAVAHALHNTLQ--CGAGS--CNRS--VTVH  
CAG03199.1 QQFCNRVCKCSNVSAEDTLAVD-----PSYAFSVYSAVYAAHALHNTLQ--CGTGT--CDSG--SVVS  
mGluR1 NFKKVCCTGNESLEENYVQ-----DSKMGFVINAIYAMAHALHNTLQ--CGTGT--CDSG--SVVS

hT1R1 PWQLLEQIHKVHFL-LHKDTVAFNDNRDP-LSSYNIIAWDWNGPKWTFVTLGSSTWSPVQLNINETKIQW  
rT1R1 PWQLLQQIYKVNFL-LHENTVAFDDNGDT-LGYDYDIIAWDWNGPEWTFEIIIGSASLSPVHLDINKTKIQW  
CAG03219.1 PWELLSRLKQVQFP-MANASVYFDSNGDP-PTGYDIIISWVRGAKWSRVVGSFSPTPISLTVADAVEV  
rT1R2 PWQLLREIWHVNFT-LLGNLFFDQQGDMLPMLLDIIQWQWDLSONPFQSIASYSPTSKRITY-INNVSW  
hT1R2 PWQLLEEIWKVNFT-LLDHQIFFDQGDV-ALHLEIVQWQWDRSQNPFSVASYPLQRLKN-IQDISW  
rT1R3 PWQLLENMYNMSFR-ARDLTLQFDAQGSV-DMEYDLKMWVWQSPPTVPLHTVGTFNGT---LQLQHSKMYW  
hT1R3 PWQLLENMYNMTFH-VGGLPLRFDSGGNV-DMEYDLKMWVWQGSVPRLHDVGRFNGS---LRTERLKIRW  
CAG07037.1 PWKLLKALRNTVD-INGTMLKFRDNGNP-NIGYSVVELILKNSLEFLEVGSFNKI---LDIKKSLFKW  
CAG03196.1 PHMVLAELKRSNFT-LLNNTIRFNEYGDPKFGSYSIVFWDKGFPEEVGFFHYFPAT--KFYINGTKIQW  
CAG03199.1 PPALLAELKRSNFT-LLNQTIFNEDGDPFGYSYAVHFWRNSGAAENFGICSFYPSIQ--IFINESKIQW  
mGluR1 GRKLLDFLIKSSFVGVSAGEVWFDEKQDA-PGRYDIMNLQYTEAN-RYDYVHVGTWHEGVLNIDYKIQW

hT1R1 HGK--DNQVPKSVCSDDCLEGHQRVV-TGFHCCFECVPCGAGTFLNK--SDLYRCQPCGKBEWAPESQT  
rT1R1 HGK--NNQVPVSVCTTDCLAGHHRVV-VGSHCCFECVPCAGTFLNM--SELHICQPCGTEWAPKESIT  
CAG03219.1 HISGDSRSVPQISCPPEFGHKRL--TGQHECCFDCQACAEATFLNE--SDPTTCTCLPBEWAPKSSQR  
rT1R2 YTP--NNTVPSMCSKSCQPGQMKKS-VGLHPCCFECIDCMPGTYLNRSADEFNCLSCPGSMWSYKNDIT  
hT1R2 HTV--NNTIPMSMCSKRCQSGQKKP-VGLHVCCFECIDCLPGTFLNHTEDYEYECQACPNNEWSYQETS  
rT1R3 PG---NQVPVQCSRQCKDQVRRV-KGFHSCCYDCVDCAGSYRKH-PDDFTCTPCGKDQWSPEKSTT  
hT1R3 HTS--DNQKPVSRCSRQCEGQVRRV-KGFHSCCYDCVDCAGSYRQN-PDDIACTFCGQDEWSPERSTR  
CAG07037.1 HTE--NSEVPESTCSAACGEGVHRV-KGFHSCCFDCIDCLPGTYQRE-KDDIQCTPCPPRQWSLKRSTR  
CAG03196.1 FQN---GEVPTSLCSTECLEGYIKKL-NGIHKCCFTCEVCPMGTFVNSTADPYSCLPCKHQWSTAGSTS  
CAG03199.1 HSK---EVPVQCSKECEEGNAKRQ-EGIHRCCFTCEICPNGTYVNIADPYSCLPCKHQWSTAGSTS

mGluR1 NK---SGMVRSVCSSEPC~~CKGQIKVIRKGEVSCCWICTACKENE~~FVQD---EFTCRACDLGW~~WPNAELTG~~

TM-I TM-II

ht1R1 CFPRTVVF~~LALREHTSWVLLAANTLLLLLL~~LGTAGLFAWHLDTPV~~VRSAGGRLCFLMLGSLAAGSGSLY~~G  
rT1R1 CFPRTVEFLAWHEPISLVLLAANTLLLLLLVGTAGLFAWHFHTPV~~VRSAGGRLCFLMLGSLVAGS~~CSFY~~S~~  
CAG03219.1 CLKRTRLLLEWDHPMSVALLFFLVCCLLMTSSSAVILLNINTPVAKSAGGRTCLLMLAALTAAMSSLC  
rT1R2 CFQRRPTFLEWHEVPTIVVAIALAALGFSTLAILFIFWRHFQTPM~~VRSAGGPMCFLMLVPLLLAFGM~~VPV  
ht1R2 CFKRQLVFLEWHEAPTIAVALLAALGFSTLAILVIFWRHFQTP~~IVRSAGGPMCFLMLTLLLVAYMV~~VPV  
rT1R3 CLPRRPKFLAWGEPAVLSLLLLLCLVLGLTLAALGLFVHYWDSPLVQASGGSLFCFGLICLGLFCLSVLL  
ht1R3 CFRRRSRFLAWGEPAVLLLLLLLLSLALGLVLAALGLFVHHRDSPLVQASGGPLACFVGLVCLGLSVLL  
CAG07037.1 CTDPTYDLSWDTPEALLTLTAIVLVLLKGAVVVLF~~LKHRGTVLVAASGGTMSFVLLGMGACLS~~LLL  
CAG03196.1 CLPRTVEWVPFTDPAAVVILAGACLLVALTAAMCVLFAVNYNTPV~~VRSAGGPMCFLILGCLSLCSIS~~VFF  
CAG03199.1 CLPRTVEWVPFTDPAAVVILAGACLLVALTAAMCVLFAVNYNTPV~~VRSAGGPMCFLILGCLSLCSIS~~VFF  
mGluR1 CEP~~IPVRYLEWSDIESIIAIAF~~SCLGILVTLFVTLIFVLYRDTPV~~VKSSSRELCYIILAGIFLGYV~~CPFT

TM-III TM-IV

ht1R1 FFGEPTRPACLLRQALFALGFTIFLSCLTVRSFQ~~LIIIFKFSTKVPTFYHAWVQNHGAGLFVMI~~SSAAQ~~L~~  
rT1R1 FFGEPTVPACLLRQPLFSLGFAIFLSCLTIRSFQ~~LVIIIFKFSTKVPTFYRTWAQNHGAGLFVIV~~SS~~TVHL~~  
CAG03219.1 HFGQPSPLACMLKQPLFTFSFTVCLACIAVRS~~LQVVCIFKFASRLPPAYDRWAKNHGPEATIFIASA~~IL  
rT1R2 YVGPPTVFSFCFRQAFFTVCF~~SICLSCITVRSFQIVCVFKMARRLPSAYSFWMRYHGPYVFA~~FITAIK~~V~~  
ht1R2 YVGPVKVSTCLCRQALFPLCFTICISCI~~AVRSFQIVCAFKMASRFPRAYSYWVRYQGPYV~~SMAFITV~~LKM~~  
rT1R3 FPGRPRSASCLAQQPMAHLPLTGCLSTLFLQAAE~~IFVESELPLSWANWLCSYLRGPWAWLVLLATL~~VEA  
ht1R3 FPGQPSPARCLAQQPLSHLPLTGCLSTLFLQAAE~~IFVESELPLSWADRLSGCLRGPWAWLVLLAM~~LVE  
CAG07037.1 FLGQPGDTCRLQLPLVSI~~FQTVPLCIIMSISLQIFFVSEFP-TLAASYLHVL~~RGP~~TWLLLLICCAVQA~~  
CAG03196.1 YFERPTEAF~~CILRFMPFLLFYAVCLACFAVRSFQIVIIIFKIAAKFPRVHSWMMKYHGQWLVI~~SMTFV~~LQA~~  
CAG03199.1 YFERPTEAF~~CILRFMPFLLFYAVCLACFAVRSFQIVIIIFKIAAKFPRVHSWMMKYHGQWLVI~~SVA~~FVLQA~~  
mGluR1 LIAKPTTSCYLQRLLVGLSSAMCYSALVTKTNRIARILAGS~~KKKICTRKRPFMSAWAQVIIASILISVQ~~

TM-V

ht1R1 LICLTWLVVWT-PLPA-REYQRFPHLVMLECTETNSL~~GFILAFLYNGLLSISAFACSYLGD~~KDLPENYNEA  
rT1R1 LICLTWLVMT-PRPT-REYQRFPHLVILECTEVNSV~~GFLAFTHNILLSISTFVCSYLKELPENYNEA~~  
CAG03219.1 CVSVLRVAVGP-PQPS-QDLDFYTD~~SIVLECSNTLSPGSFVELCYVSLLSAVCFVFSYMGKDL~~PANYNEA  
rT1R2 ALVVG~~NMLATT-INPIGR~~TDPDDPNIMILSCHPNYRN~~GLEFN~~TSM~~DL~~LLSVLGF~~SFA~~YMGKELPTNYNEA  
ht1R2 VIVVIGMLATG-LSPTTRTDPDDPKITIVSCNPNY~~RNSLLEFN~~TS~~LD~~LLSVVGF~~SFA~~YMGKELPTNYNEA  
rT1R3 ALCAWYLMAFP-PEVV-TD~~WQVLPTEVLEHCRMRSWV~~SLGLVHITNAVLAFLCFLG~~TFLVQSOPGRY~~NRA  
ht1R3 ALCTWYLVAFP-PEVV-TD~~WHMLPTEALVHCRTRS~~WV~~SFGLAHATNATLAF~~LCFLG~~TFLVRSOPGRY~~NRA  
CAG07037.1 GICGWFVQEGPSLSEYLANRRIDFVRSFLACPV~~SLSGFLMQGLITVMALISFMC~~TFMATKPLHQYNLA  
CAG03196.1 VVIVIGFSSDP--PLPYSN~~FLSYPDKIILGCDVN-LNMA~~ST~~SFF~~LL~~LL~~LCILCFTFSYMGKDL~~PKNYNEA~~  
CAG03199.1 VLIVIAFSSDP--PLPYS~~DFLSYPDKIILGCDVN-LNMA~~ST~~SFF~~FA~~IVVHPLLYFLLHGERPPEELQ~~  
mGluR1 LTLVVTLIIME-PPMPILSYPSI~~KEVYLICNTSN--LGVVAPVGYNGLLIMSCTYYAFKTRNVPANFNEA~~

TM-VI TM-VII

ht1R1 KCVTFSLLENFVSWIAFFTTASVYDGKYLPAANM~~MAGLSSLS~~SGFGGYFLPKCYVILCRP~~DLN~~STE~~HFQA~~  
rT1R1 KCVTFSLLLNFVSWIAFFTMAS~~IYQGSYLP~~AVNVL~~AGLTTLSGGFSGYFLPKCYVILCRPELN~~NTE~~HFQA~~  
CAG03219.1 KCVTFSLMVY~~MISWISFFTVYLI~~SRGPF~~TMAAYVCATL~~VSVLAFFGGYFLPKIYIIIVL~~KPHMNTTAHFQ~~  
rT1R2 KFITLSMTFSFTSSISLCTFMSVHDGVLVTIM~~DLLVTVLNFLAIGLGYFGPKCYMILFYPER~~NTSAY~~FNS~~  
ht1R2 KFITLSMTFYFTSSVSLCTFMSAYS~~GV~~LVTIVD~~LLVTVLNLLAISLGYFGPKCYMILFYPER~~NTPAY~~FNS~~  
rT1R3 RGLTFAMLAYFIIWVSFV~~PLLANVQVAYQPAVQMGAILFCALGILATFHL~~PKCYVLLWLP~~ELNTQE~~FFLG  
ht1R3 RGLTFAMLAYFITWVSFV~~PLLANVQVVLPAVQMGALLCVL~~GILAA~~FHLPRCYLLMRQPG~~LNTPE~~FFLG~~  
CAG07037.1 RDITFSSLIYCI~~IWVTFIPIYV~~GLEEK~~FKSIVVVS~~FILTSN~~LGMVAMYYIPKCYLLLRKPELN~~TAD~~HF--~~  
CAG03196.1 KAITFCLLLILTWII~~FATAFM~~LHYGKYIHTL~~NALAVLSSAYCFL~~LWYFLPKCYIIIFQ~~PHKNTQKYFQ~~  
CAG03199.1 QSHNLLASADPHLDHIC~~HRDHALPRQLH~~PH~~QRPGRALQ~~RLLLS~~PVVFP~~QMLHYHLSAP~~QEHPEVLP~~  
mGluR1 KYIAFTMYTTCIIWLA~~FVPIYFGSN--YKII~~TTCFAV~~SLSVTVALGCMFTPKMYIIIAKPER~~NVRS~~AFTT~~
